# Supplementary material for: Extracts of Selected South African Medicinal Plants Mitigate Virulence Factors in Multidrug‐Resistant Strains of Klebsiella pneumoniae
Source: Hindawi journal article supplement (doi:10.1155/2023/3146588), 2023-01-01
Supplement: f1 [file 3146588.f1.pdf]

# Extracts of selected South African medicinal plants mitigate virulence factors in multidrug resistant strains of *Klebsiella pneumoniae*

Idowu J. Adeosun<sup>1</sup>, Itumeleng T. Baloyi<sup>1</sup>, Sekelwa Cosa<sup>1\*</sup>

<sup>1</sup>Division of Microbiology, Department of Biochemistry, Genetics and Microbiology, University of Pretoria, Private Bag X20, Hatfield Pretoria 0028, South Africa; [u21747050@tuks.co.za](mailto:u21747050@tuks.co.za) (I.J.A.), [u18372882@tuks.co.za](mailto:u18372882@tuks.co.za) (I.T.B.).

\*Corresponding author: Sekelwa Cosa, Division of Microbiology, Department of Biochemistry, Genetics and Microbiology, University of Pretoria, Private Bag X20, Hatfield Pretoria 0028, South Africa. Tel: +27-12-420-4602, E-mail: [sekelwa.cosa@up.ac.za](mailto:sekelwa.cosa@up.ac.za)

## Supplementary materials

The following supplementary data forms part of this manuscript which further provides relevant information on some of the findings obtained from this study. **Figure S1:** shows a standard curve which entails the regression equation ( $Y = 0.348X - 0.074$ ) obtained for exopolysaccharide quantification. Here, Y stands for the absorbance derived from the unknown samples. **Figure S2:** illustrates the representative mass spectrometry chromatograms of the analysed plant extracts showing peaks that correspond to the data presented in the manuscript (Tables 2-4).

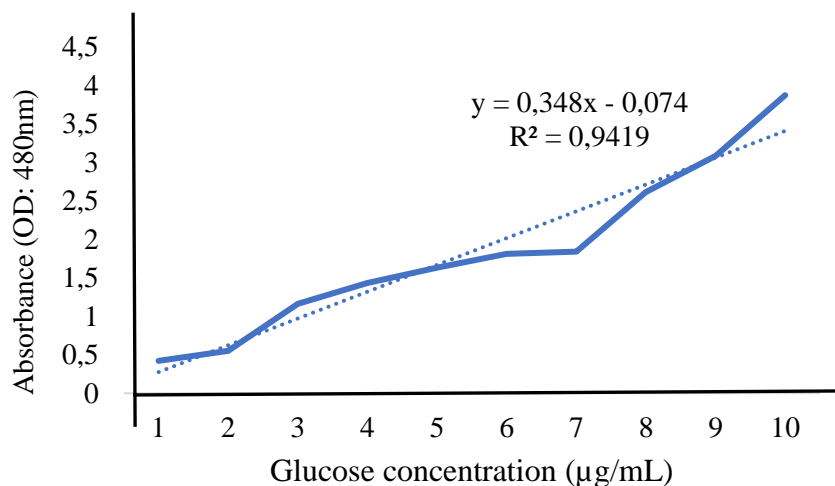

**Figure S1:** Standard curve showing the regression equation for EPS quantification.

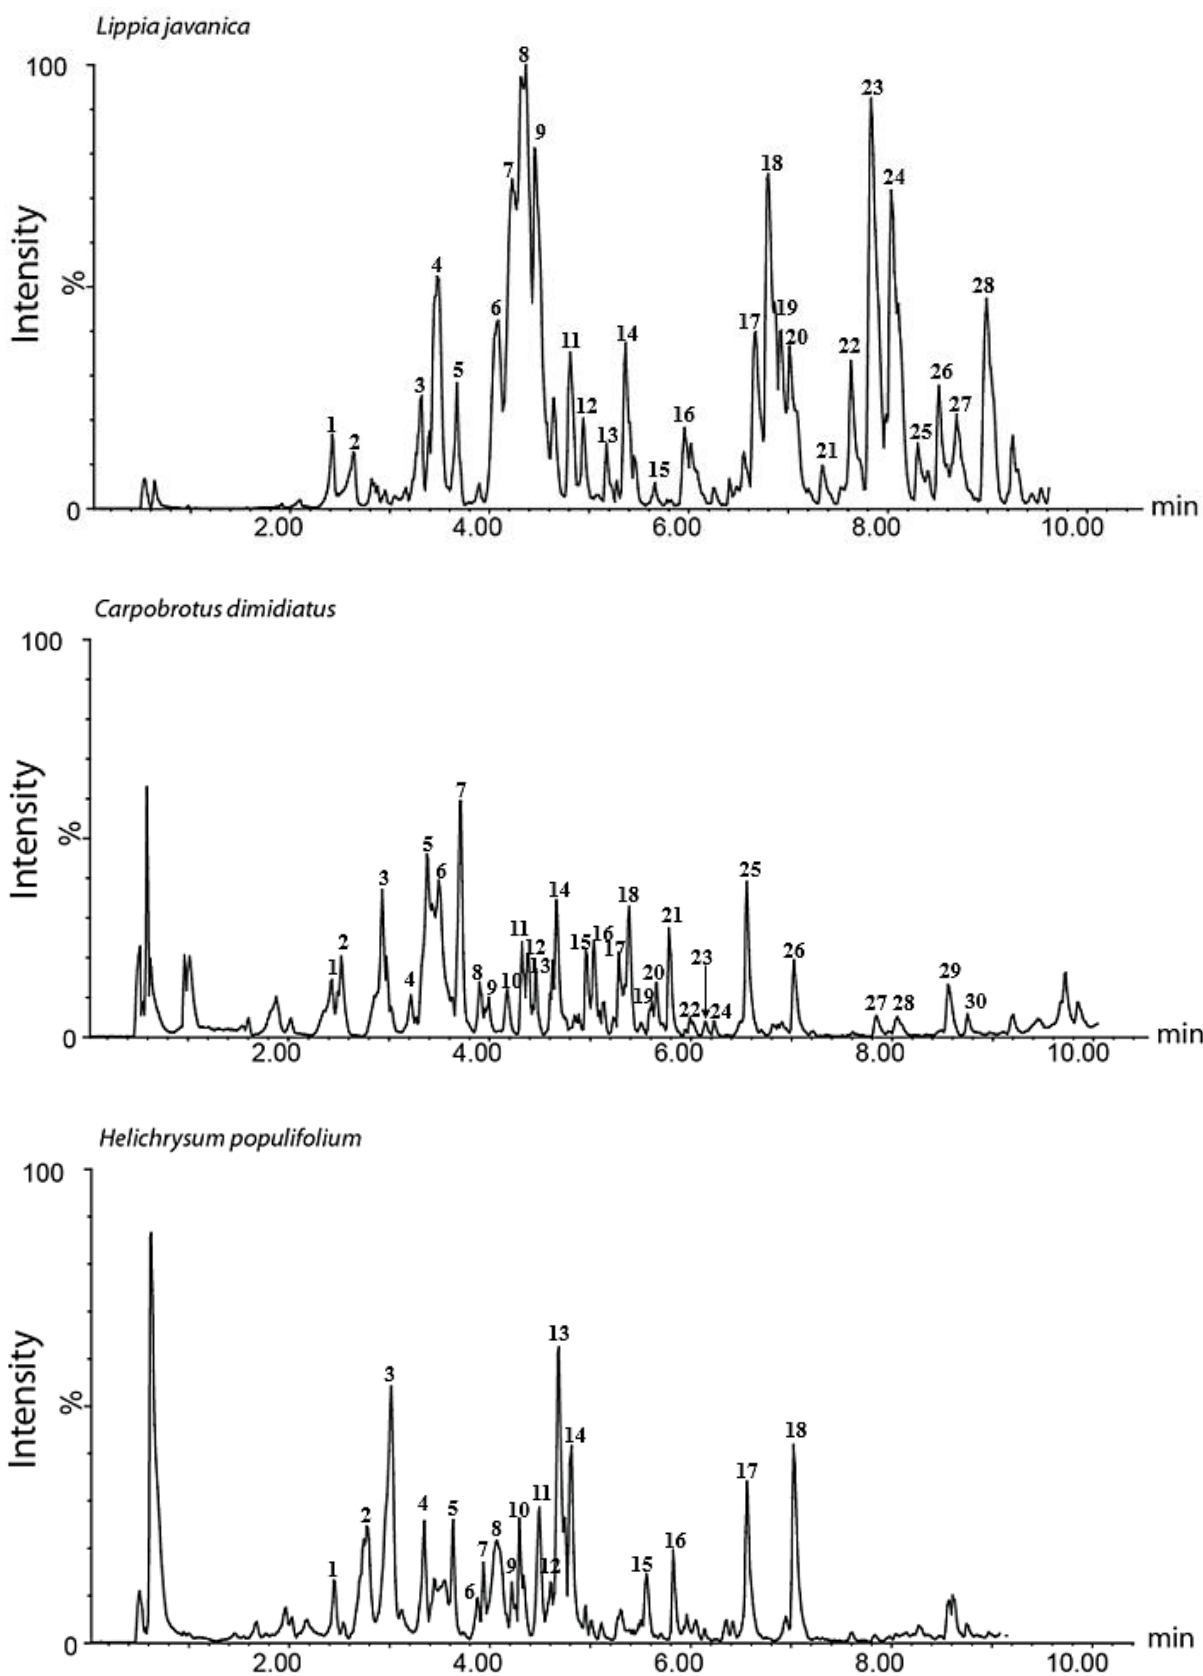

**Figure S2:** LC-MS chromatograms of *L. javanica* (ethyl acetate), *C. dimidiatus* (aqueous) and *H. populifolium* (aqueous) extract. All peaks correspond to the data presented in the manuscript (Tables 2-4).
